# Supplementary material for: Stimuli-responsive fluorochromic organic salt
Source: Royal Society of Chemistry journal article supplement (doi:10.1039/d4nj00929k), 2024-01-01
Supplement: d4nj00929k1.pdf [file d4nj00929k1.pdf]

## Supporting Information for Publication

### Multi-stimuli Responsive Fluorochromic Organic Salt

Anjum H. Kohli<sup>#a</sup>, Asif A. Malik<sup>#a</sup>, Arshid A. Ganie<sup>a</sup>, Aijaz Ahmad Dar<sup>\*</sup>

<sup>a</sup> Crystal Engineering Lab, Department of Chemistry, University of Kashmir, Hazratbal, Srinagar-190006, Jammu and Kashmir, India

<sup>#</sup> Equal First Author

<sup>\*</sup> Email: [aijazku2015@gmail.com](mailto:aijazku2015@gmail.com)/[daraijaz@uok.edu.in](mailto:daraijaz@uok.edu.in)

Orcid: 0000-0002-6180-274X

**Table S1.** Crystallographic table of **1**.

**Figure S1.** FT-IR spectra of **TPT**, **NDSA-2H** and **1**.

**Figure S2.** <sup>1</sup>H NMR Spectra of **1**.

**Figure S3.** <sup>13</sup>C NMR of **1**.

**Figure S4.** HR-MS of **1**.

**Figure S5.** DTA Curves of **1**.

**Figure S6.** TGA Curves of **1**.

**Figure S7.** P-XRD of **1** compared with its ground form (**1 G**).

**Figure S8.** Cyclic voltammogram of **TPT**, **NDSA-2H** and **1**.

**Figure S9.** Hydrogen bonded 3-dimensional network of **1**.

**Figure S10.** Curvedness and shape index of **1**.

**Figure S11.** Fingerprint plots of **1**.

**Figure S12.** UV-DRS spectra of **1** compared with **TPT** and **NDSA-2H**

**Figure S13.** Solution phase Absorption of **1** compared with **TPT** and **NDSA-2H**

**Figure S14.** TGA Curves of **1**, **1-NH<sub>3</sub>**, and **1-NH<sub>3</sub>-R**.

**Figure S15.** FT-IR spectra of **1**, **1-NH<sub>3</sub>** and **1-NH<sub>3</sub>-R**.

**Figure S16.** TGA Curves of **1** and **1-M**.

**Figure S17.** TGA Curves of **1** and **1-H**.

**Figure S18.** FT-IR spectra of **1** and **1-H**.

**Figure S19.** Total, coulomb and dispersion energy fragment of **1**.

**Table S2.** Interaction Energies (kJ/mol) of **1**.

**Table S1.** Crystallographic Table of 1.

| Reaction Code                                     | AAG-638                                                         |
|---------------------------------------------------|-----------------------------------------------------------------|
| CCDC Number                                       | 2335128                                                         |
| Empirical Formula                                 | C <sub>23</sub> H <sub>20</sub> N <sub>6</sub> O <sub>5</sub> S |
| Fw                                                | 492.51                                                          |
| Temperature [K]                                   | 0 K                                                             |
| Crystal System                                    | Triclinic                                                       |
| Space Group                                       | P -1                                                            |
| <i>a</i> , [Å]                                    | 7.2165(18)                                                      |
| <i>b</i> , [Å]                                    | 12.287(3)                                                       |
| <i>c</i> , [Å]                                    | 13.0501(14)                                                     |
| $\alpha$ , [°]                                    | 72.090(13)                                                      |
| $\beta$ , [°]                                     | 80.149(14)                                                      |
| $\gamma$ , [°]                                    | 83.652(19)                                                      |
| <i>V</i> , [Å <sup>3</sup> ]                      | 1082.8(4)                                                       |
| <i>Z</i>                                          | 2                                                               |
| <i>D</i> (calcd) [mg/cm <sup>3</sup> ]            | 1.511                                                           |
| $\mu$ [mm <sup>-1</sup> ]                         | 0.201                                                           |
| $\theta$ range [°]                                | 24.999                                                          |
| Reflns Collected                                  | 3727                                                            |
| Indep. Reflns                                     | 3727                                                            |
| GOF                                               | 1.062                                                           |
| R1(I <sub>0</sub> > 2 $\sigma$ (I <sub>0</sub> )) | 0.0368                                                          |
| wR2(all data)                                     | 0.1201                                                          |

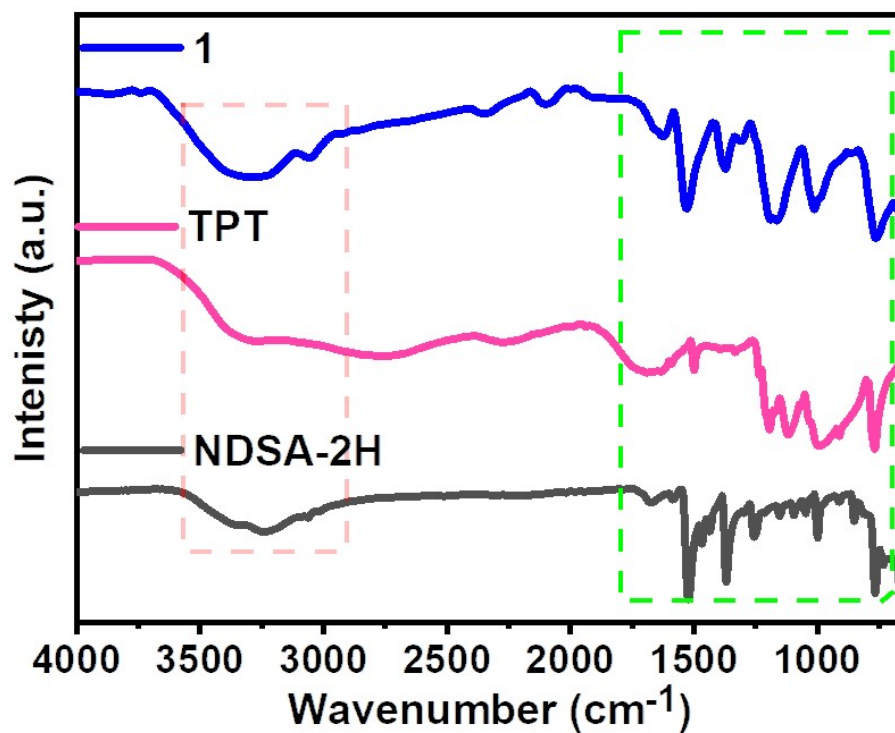

Figure S1. FT-IR spectra of **1** compared with TPT and NDSA-2H.

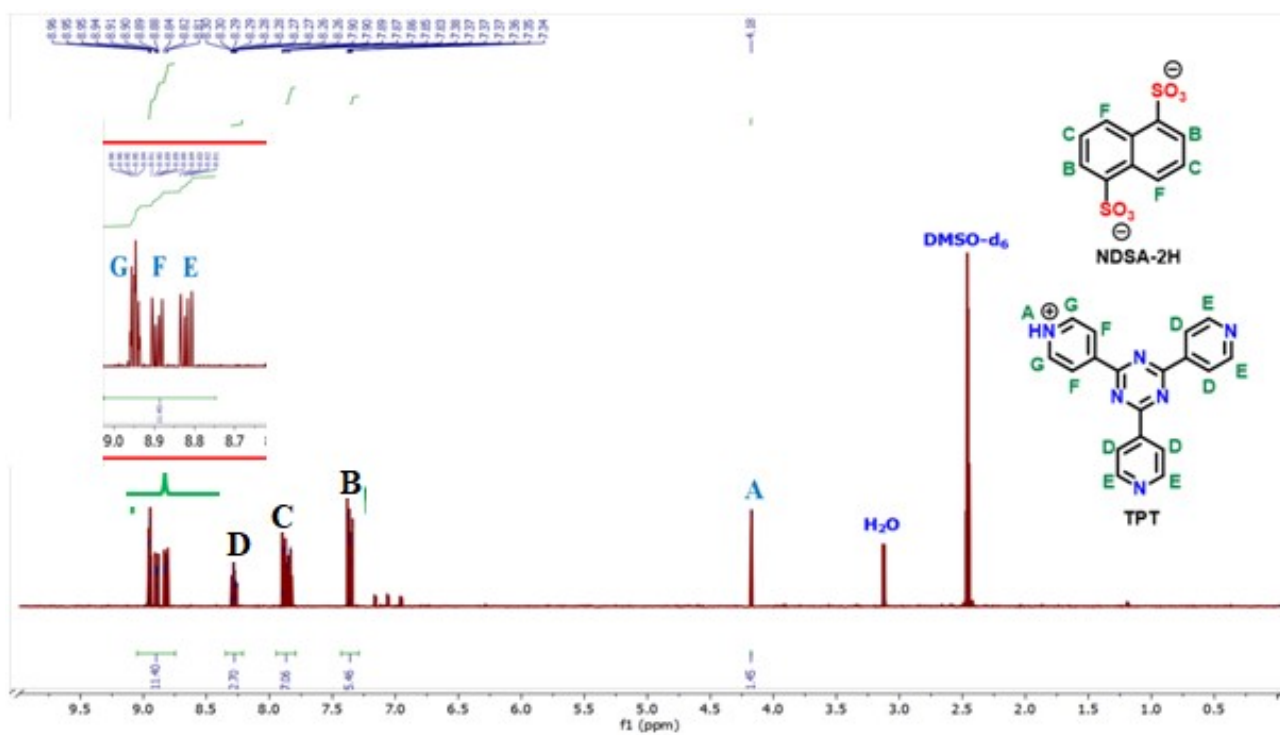

Figure S2.  $^1\text{H}$ NMR Spectra of **1**,  $\text{DMSO-}d_6$ , 400 MHz.

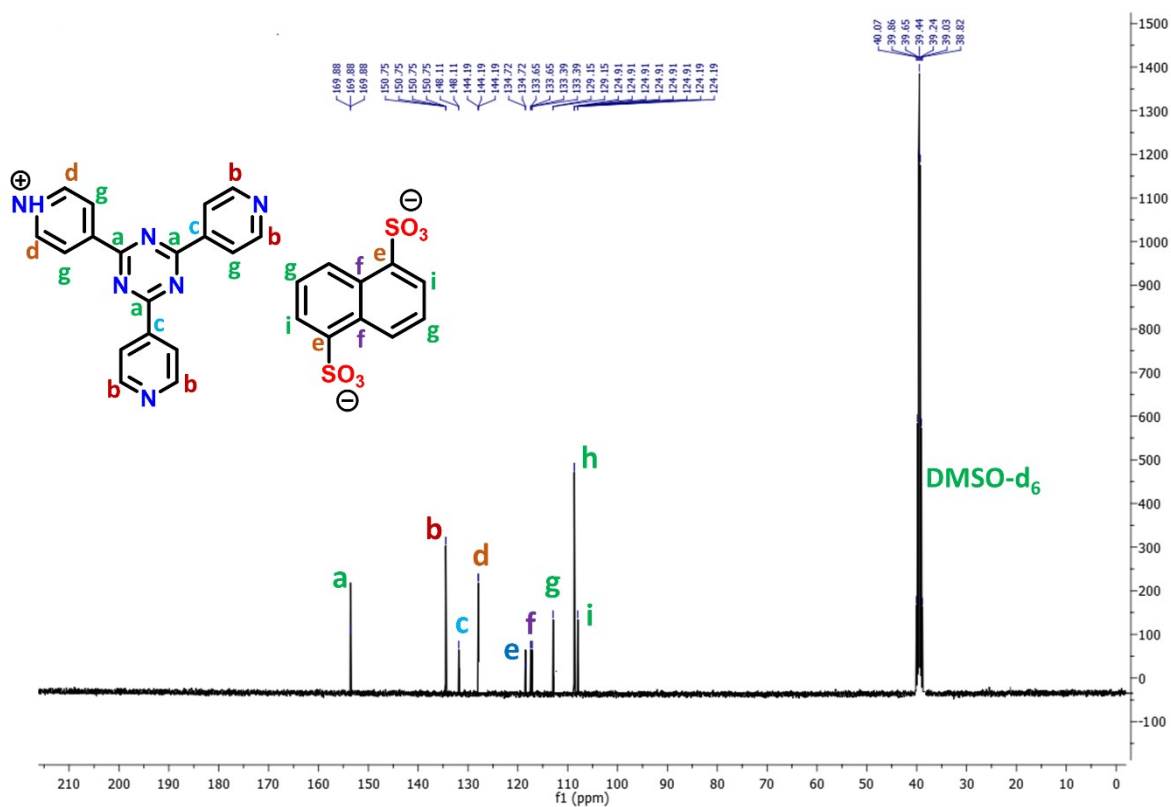

Figure S3.  $^{13}\text{C}$  NMR of 1.

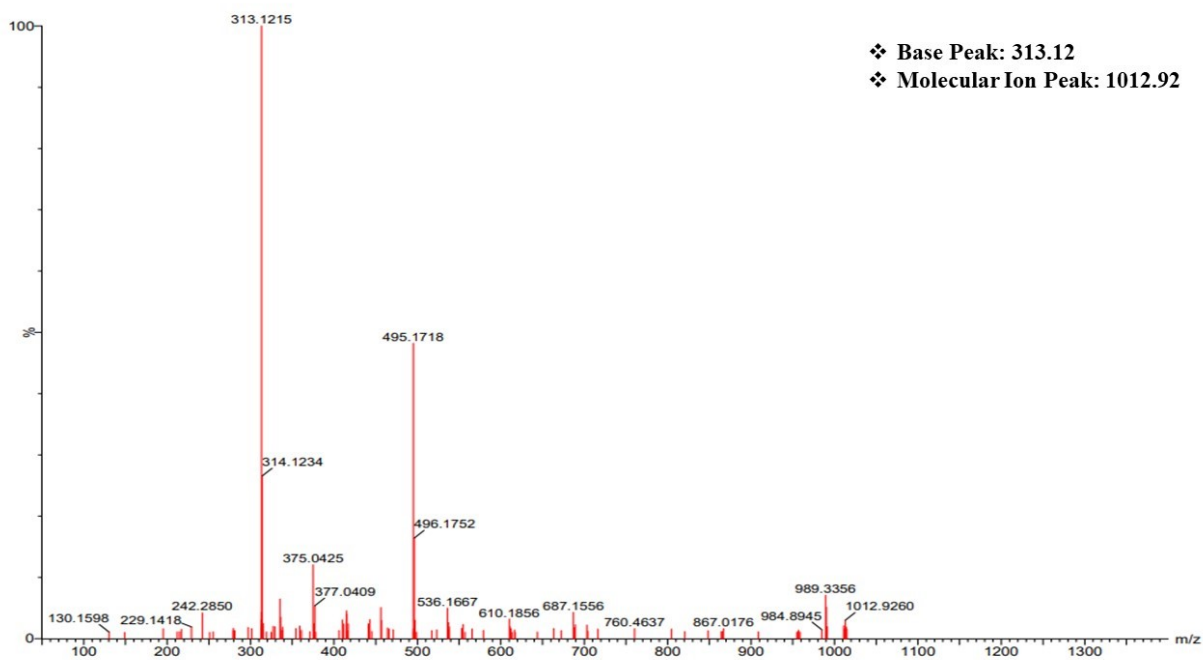

Figure S4.HR-MS of 1.

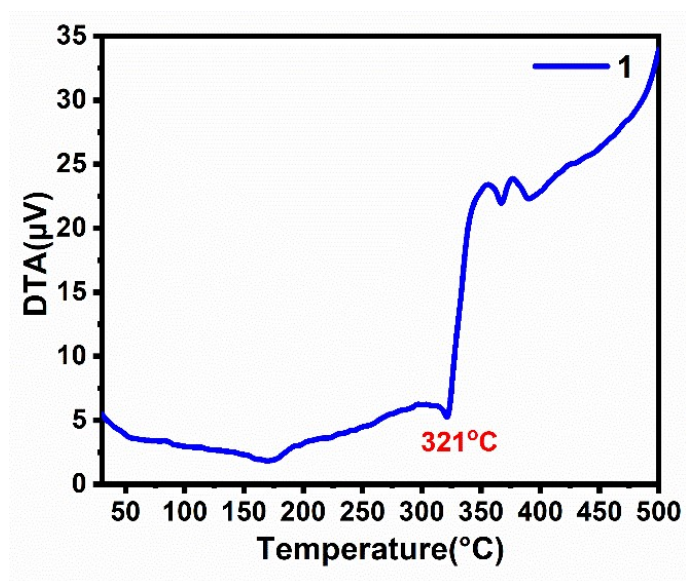

Figure S5.DTA Curves of 1.

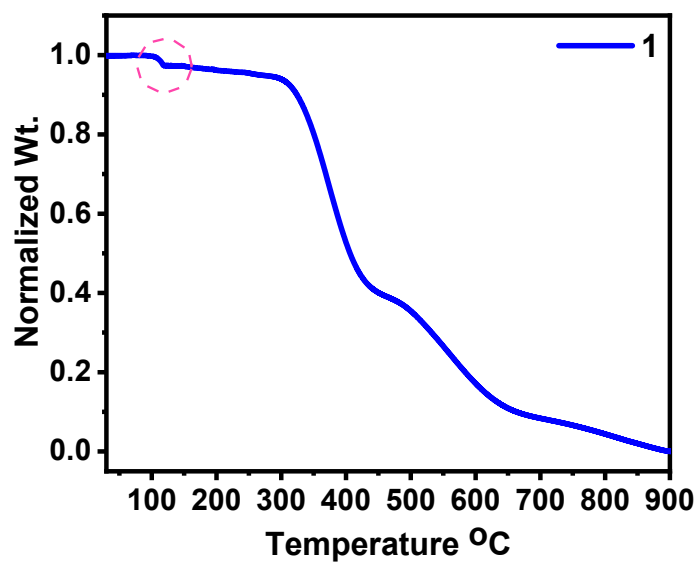

Figure S6.TGA Curves of 1, 1-NH<sub>3</sub> and 1-NH<sub>3</sub>-R.

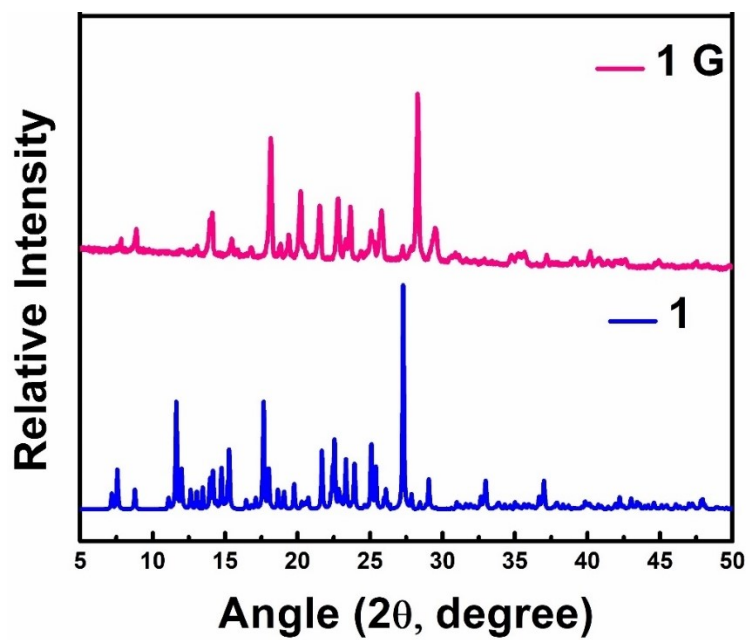

Figure S7. P-XRD of **1** compared with its ground form (**1 G**).

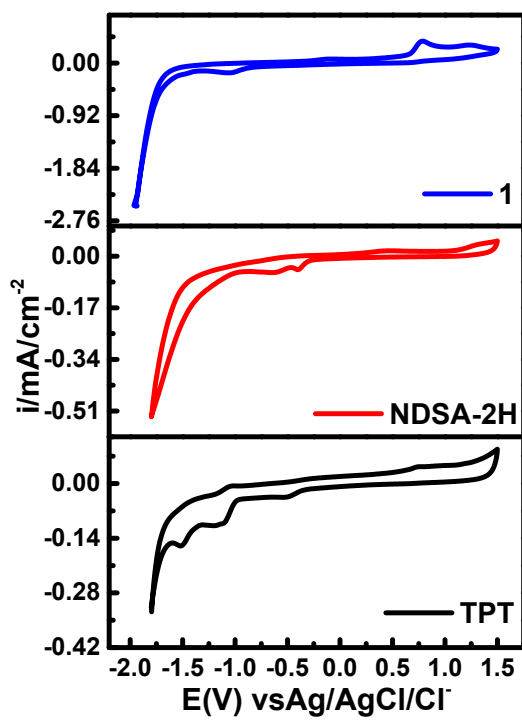

Figure S8. Cyclic voltammogram of TPT, NDSA-2H, and **1**.

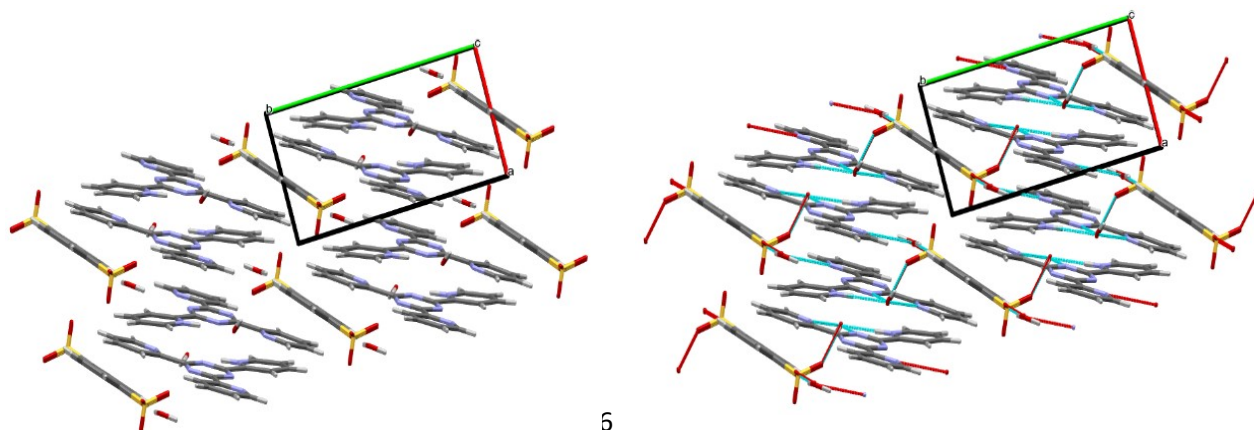

**Figure S9.** Hydrogen bonded 3-dimensional network of **1**.

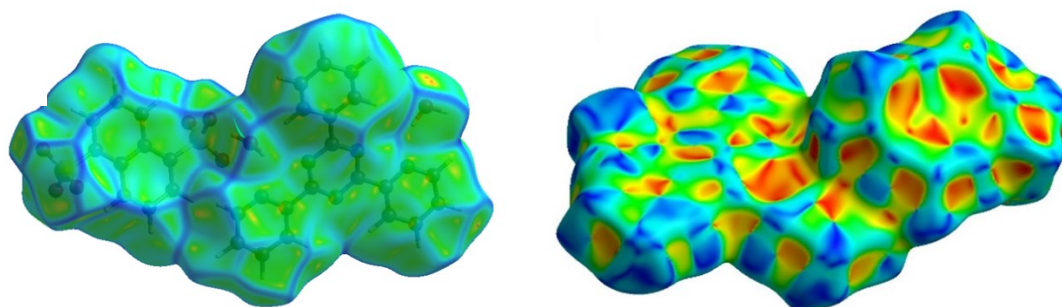

**Figure S10.** Curvedness and shape index of **1**.

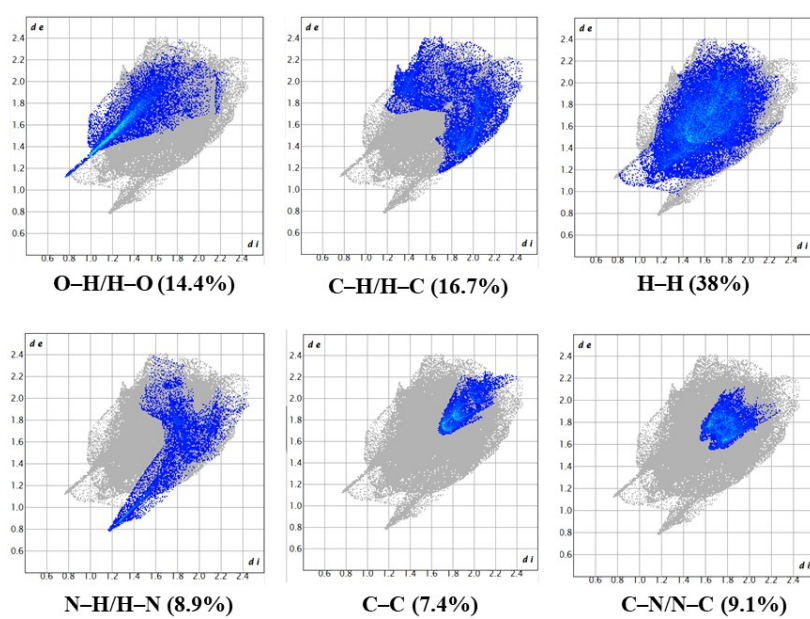

**Figure S11.** Fingerprint plots of **1**.



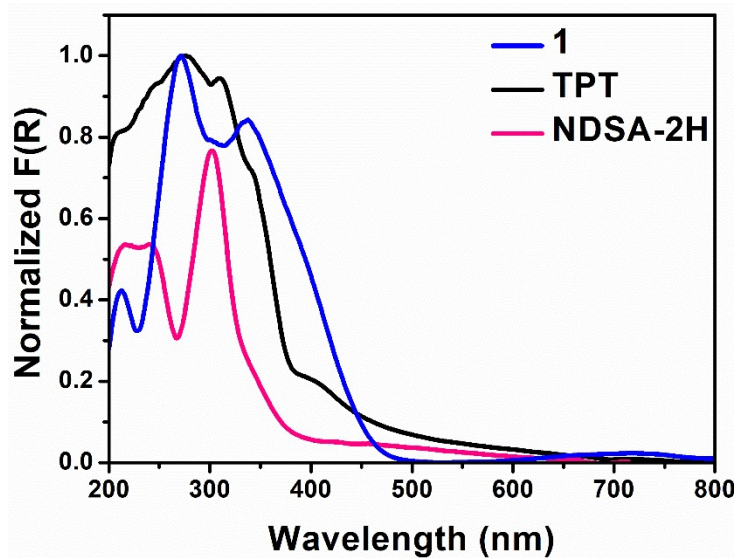

Figure S12. UV-DRS spectra of TPT, NDSA-2H, and 1.

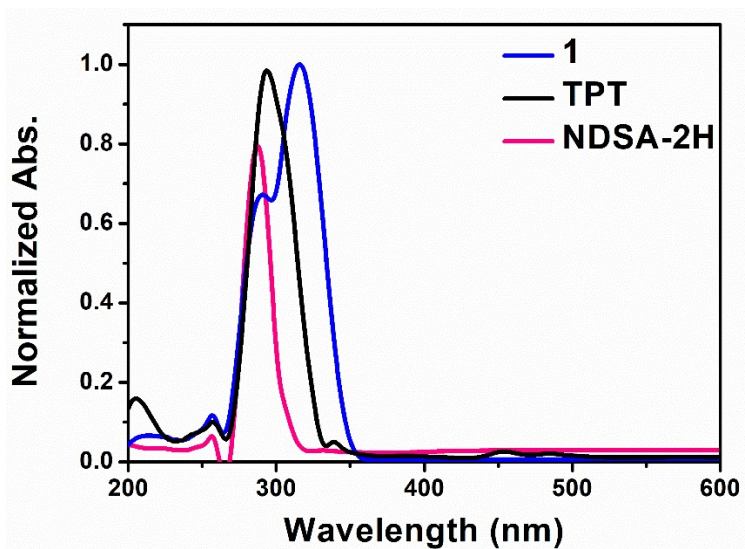

Figure S13. Solution phase Absorption of 1 compared with TPT and NDSA-2H

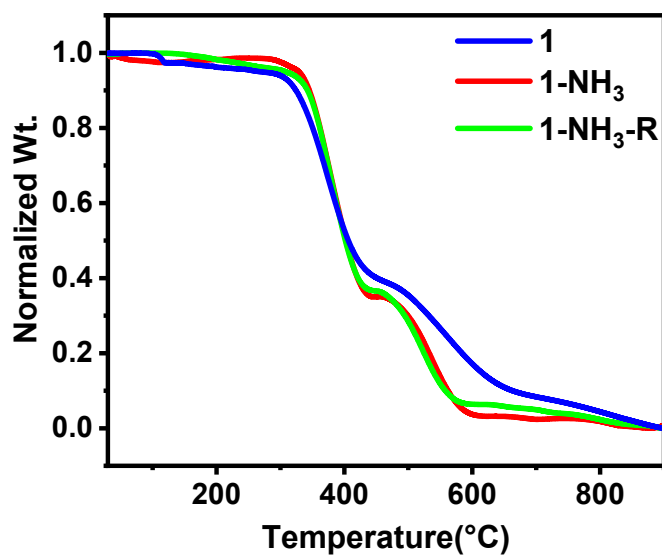

Figure S14. TGA Curves of 1, 1-NH<sub>3</sub> and 1-NH<sub>3</sub>-R.



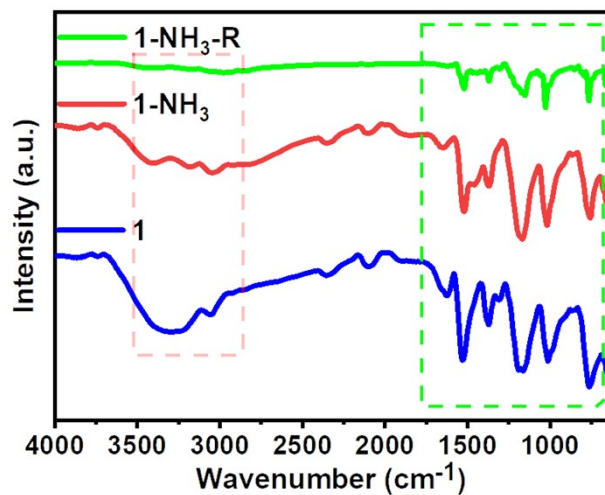

Figure S15. FT-IR spectra of 1, 1-NH<sub>3</sub> and 1-NH<sub>3</sub>-R.

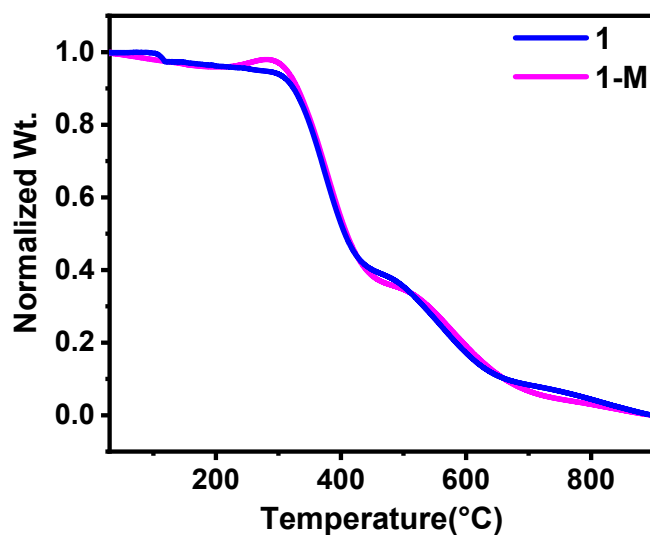

Figure S16. TGA Curves of 1 and 1-M.

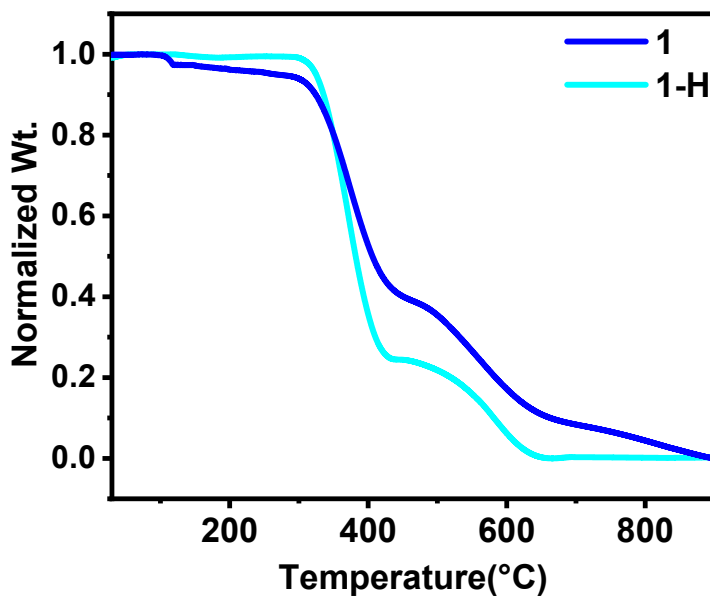

Figure S17.TGA Curves of 1 and 1-H.

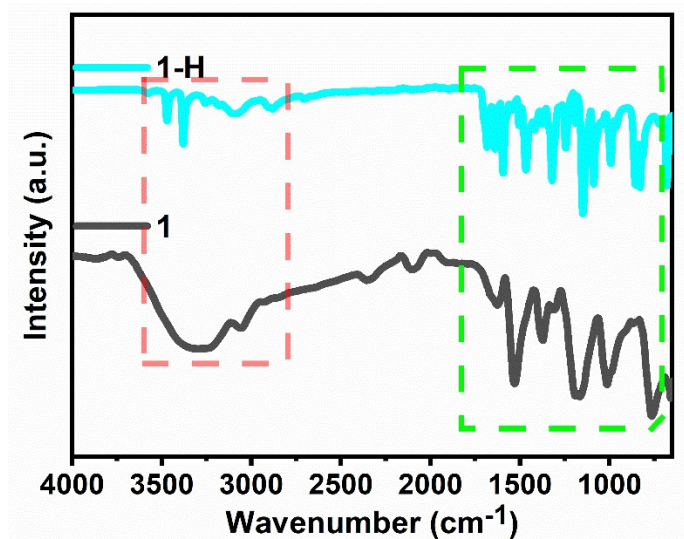

Figure S18. FT-IR spectra of 1 and 1-H.

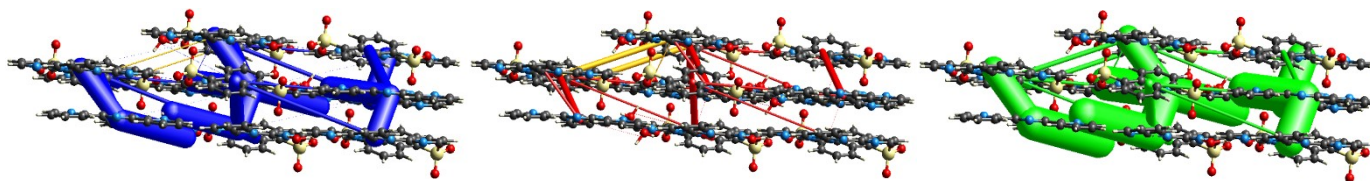

Figure S19. Total, coulomb and dispersion energy fragment of 1.

**Table S2.** Interaction Energies (kJ/mol) of **1**.

|  | N | Symop      | R     | Electron Density | E_ele | E_pol | E_dis  | E_rep | E_tot |
|--|---|------------|-------|------------------|-------|-------|--------|-------|-------|
|  | 1 | -          | 11.44 | HF/3-21G         | -6.2  | -5.3  | -9.9   | 7.8   | -12.4 |
|  | 1 | -          | 6.16  | HF/3-21G         | 0.0   | nan   | 0.0    | 0.0   | nan   |
|  | 1 | -x, -y, -z | 3.42  | HF/3-21G         | -0.6  | -6.1  | -106.9 | 47.1  | -62.7 |
|  | 2 | x, y, z    | 13.54 | HF/3-21G         | 0.0   | -0.2  | 0.0    | 0.0   | -0.1  |
|  | 1 | -x, -y, -z | 14.03 | HF/3-21G         | 0.0   | -0.5  | 0.0    | 0.0   | -0.3  |
|  | 1 | -          | 7.38  | HF/3-21G         | -21.6 | -13.4 | -32.5  | 22.4  | -41.8 |
|  | 1 | -          | 7.91  | HF/3-21G         | -20.3 | -20.9 | -28.9  | 25.3  | -39.8 |
|  | 1 | -          | 9.15  | HF/3-21G         | 0.0   | nan   | 0.0    | 0.0   | nan   |
|  | 2 | x, y, z    | 13.05 | HF/3-21G         | 0.0   | -0.3  | 0.0    | 0.0   | -0.2  |
|  | 1 | -          | 9.17  | HF/3-21G         | 17.1  | -8.0  | -15.6  | 7.0   | 3.9   |
|  | 1 | -          | 4.22  | HF/3-21G         | 0.0   | -0.3  | 0.0    | 0.0   | -0.2  |
|  | 1 | -          | 6.59  | HF/3-21G         | 0.0   | -0.0  | 0.0    | 0.0   | -0.0  |
|  | 1 | -          | 3.62  | HF/3-21G         | 3.1   | -0.5  | -4.7   | 0.0   | -1.5  |
|  | 1 | -x, -y, -z | 4.75  | HF/3-21G         | -9.3  | -6.4  | -82.9  | 38.6  | -57.0 |
|  | 1 | -x, -y, -z | 11.24 | HF/3-21G         | 0.8   | -0.2  | -6.1   | 0.4   | -4.5  |
|  | 1 | -          | 7.32  | HF/3-21G         | -0.6  | -6.1  | -106.9 | 47.1  | -62.7 |
|  | 1 | -          | 8.60  | HF/3-21G         | 0.0   | -0.5  | 0.0    | 0.0   | -0.3  |
|  | 1 | -x, -y, -z | 15.54 | HF/3-21G         | 0.0   | -0.0  | 0.0    | 0.0   | -0.0  |
|  | 1 | -x, -y, -z | 14.71 | HF/3-21G         | 0.0   | -1.0  | 0.0    | 0.0   | -0.6  |
|  | 1 | -          | 11.72 | HF/3-21G         | -7.3  | -4.2  | -11.5  | 15.4  | -8.1  |
|  | 1 | -          | 9.61  | HF/3-21G         | -20.5 | -12.9 | -17.8  | 12.3  | -35.3 |
|  | 1 | -          | 7.61  | HF/3-21G         | 0.0   | -1.0  | 0.0    | 0.0   | -0.6  |
|  | 1 | -          | 5.12  | HF/3-21G         | -0.6  | -6.1  | -106.9 | 47.1  | -62.7 |

R is the distance between molecular centroids (mean atomic position) in Å.

Total energies, only reported for two benchmarked energy models, are the sum of the four energy components, scaled appropriately (see the scale factor table below).

-----  
Scale factors for benchmarked energy models  
See Mackenzie et al. IUCrJ (2017)  
-----

| Energy Model                                     | k_ele | k_pol | k_disp | k_rep |
|--------------------------------------------------|-------|-------|--------|-------|
| CE-HF ... HF/3-21G electron densities            | 1.019 | 0.651 | 0.901  | 0.811 |
| CE-B3LYP ... B3LYP/6-31G(d,p) electron densities | 1.057 | 0.740 | 0.871  | 0.618 |
